# Supplementary material for: Anopheles Immune Genes and Amino Acid Sites Evolving Under the Effect of Positive Selection
Source: PLoS One. 2010 Jan 26;5(1):e8885. doi: 10.1371/journal.pone.0008885 (PMC2811201; doi:10.1371/journal.pone.0008885)
Supplement: Table S1 — MDL1 protein alignment (0.04 MB XLS) [file pone.0008885.s001.xls]

## Sheet: AgMDL1_protein
										1	1111111111	1111111111	1111111111	1111111111	1111111111	1
	1	1111111112	2222222223	3333333334	4444444445	5555555556	6666666667	7777777778	8888888889	9999999990	0000000001	1111111112	2222222223	3333333334	4444444445	5
	1234567890	1234567890	1234567890	1234567890	1234567890	1234567890	1234567890	1234567890	1234567890	1234567890	1234567890	1234567890	1234567890	1234567890	1234567890	1
ARA355_A	MKYFQTVAIV	ALCLNVAWAE	VVNFKKCPGE	EKCTIHEVSI	SPCPEAAEGV	ACTVYRGTNV	SISFDFTPEF	AANELTADVS	WTQPNFDLPF	VGMDTAACKS	TKCPTVSGTR	QTYAYDLPIK	KSYPPKHYDV	KWKLTGENSE	SCCFIVQ???	?
ARA355_B	MKYFQTVAIV	ALCLNVAWAE	VVNFKKCPGE	EKCTIHEVSI	PPCPEAAEGV	ACTVYRGTNV	SISFDFTPEF	AANELTADVS	WTQPNFDLPF	VGMDTAACKS	TKCPTVSGTR	QTYAYDLPIK	KSYPPKHYDV	KWKLTGENSE	SCCFIVQ???	?
ARA356_A	MKYFQTVAIV	ALCLNVAWAE	VVNFKKCPGE	EKCTIHEVSI	SPCPEAAEGV	ACTVYRGTNV	SISFDFTPEF	AANELTADVS	WTQPNFDLPF	VGMDTAACKS	TKCPTVSGTR	QTYAYDLPIK	KSYPPKHYDV	KWKLTGENSE	SCCFIV????	?
ARA356_B	MKYFQTVAIV	ALCLNVAWAE	VVNFKKCPGE	EKCTIHEVSI	SPCPEAAEGV	ACTVYRGTNV	SISFDFTPEF	AANELTADVS	WTQPNFDLPF	VGMDTAACKS	TKCPTVSGTR	QTYAYDLPIK	KSYPPKHYDV	KWKLTGENSE	SCCFIV????	?
ARA357_A	MKYFQTVAIV	ALCLNVAWAE	VVNFKKCPGE	EKCTIHEVSI	SPCPEAAEGV	ACTVYRGTNV	SISFDFTPEF	AANELTADVS	WTQPNFDLPF	VGMDTAACKS	TKCPTVSGTR	QTYAYDLPIK	KSYPPKHYDV	KWKLTGENSE	SCCFIV????	?
ARA357_B	MKYFQTVAIV	ALCLNVAWAE	VVNLKKCPGE	EKCTIHEVSI	SPCPEAAEGV	ACTVYRGTNV	SISFDFTPEF	AANELTADVS	WTQPNFDLPF	VGMDTAACKS	TKCPTVSGTR	QTYAYDLPIK	KSYPPKHYDV	KWKLTGENSE	SCCFIVQI??	?
ARA365_A	MKYFQTVAIV	ALCLNVAWAE	VVNFKKCPGE	EKCTIHEVSI	SPCPEAAEGV	ACTVYRGTNV	SISFDFTPEF	AANELTADVS	WTQPNFDLPF	VGMDTAACKS	TKCPTVSGTR	QTYAYDLPIK	KSYPPKHYDV	KWKLTGENSE	SCCFIVQ???	?
ARA365_B	MKYFQTVAIV	ALCLNVAWAE	VVNFKKCPGE	EKCTIHEVSI	SPCPEAAEGV	ACTVYRGTNV	SISFDFTPEF	AANELTADVS	WTQPNFDLPF	VGMDTAACKS	TKCPTVSGTR	QTYAYDLPIK	KSYPPKHYDV	KWKLTGENSE	SCCFIVQ???	?
ARA368_A	MKYFQTVAIV	ALCLNVAWAE	VVNFKKCPGE	EKCTIHEVSI	SPCPEAAEGV	ACTVYRGTNV	SISFDFTPEF	AANELTADVS	WTQPNFDLPF	VGMDTAACKS	TKCPTVSGTR	QTYAYDLPIK	KSYPPKHYDV	K?????????	??????????	?
ARA368_B	????????IV	ALCLNVAWAE	VVNFKKCPGE	EKCTIHEVSI	SPCPEAAEGV	ACTVYRGTNV	SISFDFTPEF	AANELTADVS	WTQPNFDLPF	VGMDTAACKS	TKCPTVSGTR	QTYAYDLPIK	KSYPPKHYDV	E?????????	??????????	?
BWA11_A	MKYFQTVAIV	ALCLNVAWAE	VVNFKKCPGE	EKCTIHEVSI	SPCPEAAEGV	ACTVYRGTNV	SISFDFTPEF	AANELTADVS	WTQPNFDLPF	VGMDTAACKS	TKCPTVSGTR	QTYAYDLPIK	KSYPPKHYDV	KWKLTGENS?	??????????	?
BWA11_B	MKYFQTVAIV	ALCLNVAWAE	VVNFKKCPGE	EKCTIHEVSI	SPCPEAAEGV	ACTVYRGTNV	SISFDFTPEF	AANELTADVS	WTQPNFDLPF	VGMDTAACKS	TKCPTVSGTR	QTYAYDLPIK	KSYPPKHYDV	KWKLTGE???	??????????	?
BWA12_A	MKYFQTIAIV	ALCLNVAWAE	VVNFKKCPGE	EKCTIHEVSI	SPCPEAAEGV	ACTVYRGTNV	SISFDFTPEF	AANELTADVS	WTQPNFDLPF	VGMDTAACKS	TKCPTVSGTR	QTYAYDLPIK	KSYPPKHYDV	K?????????	??????????	?
BWA12_B	MKYFQTVAIV	ALCLNVAWAE	VVNFKKCPGE	EKCTIHEVSI	SPCPEAAEGV	ACTVYRGTNV	SISFDFTPEF	AANELTADVS	WTQPNFDLPF	VGMDTAACKS	TKCPTVSGTR	QTYAYDLPIK	KSYPPKHYDV	KWKL??????	??????????	?
BWA13_A	MKYFQTVAIV	ALCLNVAWAE	VVNFKKCPGE	EKCTIHEVSI	SPCPEAAEGV	ACTVYRGTNV	SISFDFTPEF	ATNELTADVS	WTQPNFDLPF	VGMDTAACKS	TKCPTVSGTR	QTYAYDLPIK	KSYPPKHYDV	KWKLTGEN??	??????????	?
BWA13_B	MKYFQTVAIV	ALCLNVAWAE	VVNFKKCPGE	EKCTIHEVSI	SPCPEAAEGV	ACTVYRGTNV	SISFDFTPEF	ATNELTADVS	WTQPNFDLPF	VGMDTAACKS	TKCPTVSGTR	QTYAYDLPIK	KSYPPKHYDV	KWKLTGENS?	??????????	?
BWA15_A	MKYFQTVAIV	ALCLNVAWAE	VVNFKKCPGE	EKCTIHEVSI	SPCPEAAEGV	ACTVYRGTNV	SISFDFTPEF	AANELTADVS	WTQPNFDLPF	VGMDTAACKS	TKCPTVSGTR	QTYAYDLPIK	KSYPPKHYDV	KWKLTGENS?	??????????	?
BWA15_B	MKYFQTVAIV	ALCLNVAWAE	VVNFKKCPGE	EKCTIHEVSI	SPCPEAAEGV	ACTVYRGTNV	SISFDFTPEF	AANELTADVS	WTQPNFDLPF	VGMDTAACKS	TKCPTVSGTR	QTYAYDLPIK	KSYPPKHYDV	KWKLTGEN??	??????????	?
BWA16_A	MKYFQTVAIV	ALCLNVAWAE	VVNFKKCPGE	EKCTIHEVSI	SPCPEAAEGV	ACTVYRGTNV	SISFDFTPEF	ATNELTADVS	WTQPNFDLPF	VGMDTAACKS	TKCPTVSGTR	QTYAYDLPIK	KSYPPKHYDV	KWKLTGENSE	SCCFIVQ???	?
BWA16_B	MKYFQTVAIV	ALCLNVAWAE	VVNFKKCPGE	EKCTIHEVSI	SPCPEAAEGV	ACTVYRGTNV	SISFDFTPEF	AANELTADVS	WTQPNFDLPF	VGMDTAACKS	TKCPTVSGTR	QTYAYDLPIK	KSYPPKHYDV	KWKLTGENSE	SCCFIVQ???	?
BWA17_A	MKYFQTVAIV	ALCLNVAWAE	VVNFKKCPGE	EKCTIHEVSI	SPCPEAAEGV	ACTVYRGTNV	SISFDFTPEF	ATNELTADVS	WTQPNFDLPF	VGMDTAACKS	TKCPTVSGTR	QTYAYDLPIK	KSYPPKHYDV	KWKLTGENS?	??????????	?
BWA17_B	MKYFQTVAIV	ALCLNVAWAE	VVNFKKCPGE	EKCTIHEVSI	SPCPEAAEGV	ACTVYRGTNV	SISFDFTPEF	ATNELTADVS	WTQPNFDLPF	VGMDTAACKS	TKCPTVSGTR	QTYAYDLPIK	KSYPPKHYDV	KWKLTGE???	??????????	?
GAM08_A	MKYFQTVAIV	ALCLNVAWAE	VVNFKKCPGE	EKCTIHEVSI	SPCPEAAEGV	ACTVYRGTNV	SISFDFTPEF	AANELTADVS	WTQPNFDLPF	VGMDTAACKS	TKCPTVSGTR	QTYAYDLPIK	KSYPPKHYDV	KWKLTGENSE	SCCFIVQI??	?
GAM08_B	MKYFQTVAIV	ALCLNVAWAE	VVNFKKCPGE	EKCTIHEVSI	SPCPEAAEGV	ACTVYRGTNV	SISFDFTPEF	AANELTADVS	WTQPNFDLPF	VGMDTAACKS	TKCPTVSGTR	QTYAYDLPIK	KSYPPKHYDV	KWKLTGENSE	SCCFIV????	?
GAM11	MKYFQTVAIV	ALCLNVAWAE	VVNFKKCPGE	EKCTIHEVSI	SPCPEAAEGV	ACTVYRGTNV	SISFDFTPEF	AANELTADVS	WTQPNFDLPF	VGMDTAACKS	TKCPTVSGTR	QTYAYDLPIK	KSYPPKHYDV	KWKLTGENSE	SCCFIV????	?
GAM12_A	MKYFQTVAIV	ALCLNVAWAE	VVNFKKCPGE	EKCTIHEVSI	SPCPEAAEGV	ACTVYRGTNV	SISFDFTPEF	AANELTADVS	WTQPNFDLPF	VGMDTAACKS	TKCPTVSGTR	QTYAYDLPIK	KSYPPKHYDV	KWKLTGENSE	SCCFIV????	?
GAM12_B	MKYFQTVAIV	ALCLNVAWAE	VVNFKKCPGE	EKCTIHEVSI	SPCPEAAEGV	ACTVYRGTNV	SISFDFTPEF	AANELTADVS	WTQPNFDLPF	VGMDTAACKS	TKCPTVSGTR	QTYAYDLPIK	KSYPPKHYDV	KWKLTGENSE	SCCFIVQ???	?
GAM14_A	MKYFQTVAIV	ALCLNVAWAE	VVNFKKCPGE	EQCTIHEVSI	SPCPEAAEGV	ACTVYRGTNV	SISFDFTPEF	AANELTADVS	WTQPNFDLPF	VGMDTAACKS	TKCPTVSGTR	QTYAYDLPIK	KSYPPKHYDV	KWKLTGENSE	SCCFIV????	?
GAM14_B	MKYFQTVAIV	ALCLNVAWAE	VVNFKKCPGE	EKCTIHEVSI	SPCPEAAEGV	ACTVYRGTNV	SISFDFTPEF	AANELTADVS	WTQPNFDLPF	VGMDTAACKS	TKCPTVSGTR	QTYAYDLPIK	KSYPPKHYDV	KWKLTGENSE	SCCFIV????	?
GAM54	MKYFQTVAIV	ALCLNVAWAE	VVNFKKCPGE	EKCTIHEVSI	SPCPEAAEGV	ACTVYRGTNV	SISFDFTPEF	AANELTADVS	WTQPNFDLPF	VGMDTAACKS	TKCPTVSGTR	QTYAYDLPIK	KSYPPKHYDV	KWKLTGENSE	SCCFIVQ???	?
GAM57_A	MKYFQTVAIV	ALCLNVAWAE	VVNFKKCPGE	EKCTIHEVSI	SPCPEAAEGV	ACTVYRGTNV	SISFDFTPEF	AANELTADVS	WTQPNFDLPF	VGMDTAACKS	TKCPTVSGTR	QTYAYDLPIK	KSYPPKHYDV	KWKLTGENSE	SCCFIVQ???	?
GAM57_B	MKYFQTVAIV	ALCLNVAWAE	VVNFKKCPGE	EKCTIHEVSI	SPCPEAAEGV	ACTVYRGTNV	SISFDFTPEF	AASELTADVS	WTQPNFDLPF	VGMDTAACKS	TKCPTVSGTR	QTYAYDLPIK	KSYPPKHYDV	KWKLTGENSE	SCCFIVQ???	?
GAM59_A	MKYFQTVAIV	ALCLNVAWAE	VVNFKKCPGE	EKCTIHEVSI	SPCPEAAEGV	ACTVYRGTNV	SISFDFTPEF	AANELTADVS	WTQPNFDLPF	VGMDTAACKS	TKCPTVFGTR	QTYAYDLPIK	KSYPPKHYDV	KWKLTGEN??	??????????	?
GAM59_B	MKYFQTVAIV	ALCLNVAWAE	VVNFKKCPGE	EKCTIHEVSI	SPCPEAAEGV	ACTVYRGTNV	SISFDFTPEF	AANELTADVS	WTQPNFDLPF	VGMDTAACKS	TKCPTVFGTR	QTYAYDLPIK	KSYPPKHYDV	KWKLTGEN??	??????????	?
MEL03	MKYFQTVAIV	ALCLNVAWAE	VVNFKKCPGE	EKCTIHEVSI	SPCPEAAEGV	ACTVYRGTNV	SISFDFIPEF	AANELTADVS	WTQPNFDLPF	VGMDTAACKS	TKCPTVSGTR	QTYAYDLPIK	KSYPPKHYDV	KWKLTGENNE	SCCFIVQ???	?
MEL04	MKYFQTVAIV	ALCLNVAWAE	VVNFKKCPGE	EKCTIHEVSI	SPCPEAAEGV	ACTVYRGTNV	SISFDFIPEF	AANELTADVS	WTQPNFDLPF	VGMDTAACKS	TKCPTVSGTR	QTYAYDLPIK	KSYPPKHYDV	KWKLTGENNE	SCCFIVQ???	?
MEL05_A	MKYFQTVAIV	ALCLNVAWAE	VVNFKKCPGE	EKCTIHEVSI	SPCPEAAEGV	ACTVYRGTNV	SISFDFIPEF	AANELTADVS	WTQPNFDLPF	VGMDTAACKS	TKCPTVSGTR	QTYAYDLPIK	KSYPPKHYDV	KWKLTGENNE	SCCFIVQ???	?
MEL05_B	MKYFQTVAIV	ALCLNVAWAE	VVNFKKCPGE	EKCTIHEVSI	SPCPEAAEGV	ACTVYRGTNV	SISFDFIPEF	AANELTADVS	WTQPNFDLPF	VGMDTAACKS	TKCPTVSGTR	QTYAYDLPIK	KSYPPKHYDV	KWKLTGENNE	SCCFIVQI??	?
MEL30	MKYFQQVAIV	PLCLNVAWAE	VVNFKKCPGE	EKCTIHEVSI	SPCPEAAEGV	ACTVYRGTNV	SISFDFIPEF	AANELTADVS	WTQPNFDLPF	VGMDTAACKS	TKCPTVSGTR	QTYAYDLPIK	KSYPPKHYDV	KWKLTGENN?	??????????	?
MEL31_A	MKYFQTVAIV	ALCLNVAWAE	VVNFKKCPGE	EKCTIHEVSI	SPCPEAVEGV	ACTVYRGTNV	SISFDFIPEF	AANELTADVS	WTQPNFDLPF	VGMDTAACKS	TKCPTVSGTR	QTYAYDLPIK	KSYPPKHYDV	KWKLTGENNE	SCCFIVQ???	?
MEL31_B	MKYFQTVAIV	ALCLNVAWAE	VVNFKKCPGE	EKCTIHEVSI	SPCPEAVEGV	ACTVYRGTNV	SISFDFIPEF	AANELTADVS	WTQPNFDLPF	VGMDTAACKS	TKCPTVSGTR	QTYAYDLPIK	KSYPPKHYDV	KWKLTGENNE	SCCFIVQ???	?
MEL32_A	MKYFQTVAIV	ALCLNVAWAE	VVNFKKCPGE	EKCTIHEVSI	SPCPEAAEGV	ACTVYRGTNV	SISFDFIPEF	AANELTADVS	WTQPNFDLPF	VGMDTAACKS	TKCPTVSGTR	QTYAYDLPIK	KSYPPKHYDV	KWKLTGENNE	SCCFIVQIN?	?
MEL32_B	MKYFQTVAIV	ALCLNVAWAE	VVNFRKCPGE	EKCTIHEVSI	SPCPEAAEGV	ACTVYRGTNV	SISFDFIPEF	AANELTADVS	WTQPNFDLPF	VGMDTAACKS	TKCPTVSGTR	QTYAYDLPIK	KSYPPKHYDV	KWKLTGENNE	SCCFIVQIN?	?
MEL33	MKYFQTVAIV	ALCLNVAWAE	VVNFKKCPGE	EKCTIHEVSI	SPCPEAAEGV	ACTVYRGTNV	SISFNFIPEF	AANELTADVS	WTQPNFDLPF	VGMDTAACKS	TKCPTVSGTR	QTYAYDLPIK	KSYPPKHYDV	KWKLTGENNE	SCCFIV????	?
MER559_A	MKYFQTVAIV	ALCLNVAWAE	VVNFKKCPGE	EKCTIHEVSI	TPCPEAAEGV	ACTVYRGTNV	SISFDFTPEF	AANELTADVS	WTQPNFDLPF	VGMDTAACKS	TKCPTVSGTR	QTYAYDLPIK	KSYPPKHYDV	KWKLTGENSE	SCCFIVQ???	?
MER559_B	MKYFQTVAIV	ALCLNVAWAE	VVNFKKCPGE	EKCTIHEVSI	TPCPEAAEGV	ACTVYRGTNV	SISFDFTPEF	AANELTADVS	WTQPNFDLPF	VGMDTAACKS	TKCPTVSGTR	QTYAYDLPIK	KSYPPKHYDV	KWKLTGENSE	SCCFIVQ???	?
MER562_A	MKYFQTVAIV	ALCLNVAWAE	VVNFKKCPGE	EKCTIHEVSI	TPCPEAAEGV	ACTVYRGTNV	SISFDFTPEF	AANELTADVS	WTQPNFDLPF	VGMDTAACKS	TKCPTVSGTR	QTYAYDLPIK	KSYPPKHYDV	KWKLTGENSE	SCCFIVQ???	?
MER562_B	MKYFQTVAIV	ALCLNVAWAE	VVNFKKCPGE	EKCTIHEVSI	TPCPEAAEGV	ACTVYRGTNV	SISFDFTPEF	AANELTADVS	WTQPNFDLPI	VGMDTAACKS	TKCPTVSGTR	QTYAYDLPIK	KSYPPKHYDV	KWKLTGENSE	SCCLIVQ???	?
MER563	MKYFQTVAIV	ALCLNVAWAE	VVNFKKCPGE	EKCTIHEVSI	TPCPEAAEGV	ACTVYRGTNV	SISFDFTPEF	AANELTADVS	WTQPNFDLPF	VGMDTAACKS	TKCPTVSGTR	QTYAYDLPIK	KSYPPKHYDV	KWKLTGENSE	SCCFIVQ???	?
MER565_A	MKYFQTVAIV	ALCLNVAWAE	VVNFKKCPGE	EKCTIHEVSI	TPCPEAAEGV	ACTVYRGTNV	SISFDFTPEF	AANELTADVS	WTQPNFDLPF	VGMDTAACKS	TKCPTVSGTR	QTYAYDLPIK	KSYPPKHYDV	KWKLTGENSE	SCCFIVQ???	?
MER565_B	MKYFQTVAIA	ALCPNVAWAE	VVNFKKCPGE	EKCTIHEVSI	TPCPEAAEGV	ACTVYRGTNV	SISFDFTPEF	AANELTADVS	WTQPNFDLPF	VGMDTAACKS	TKCPTVSGTR	QTYAYDLPIK	KSYPPKHYDV	KWKLTGENSE	SCCFIVQ???	?
MER566_A	MKYFQTVAIV	ALCLNVAWAE	VVNFKKCPGE	EKCTIHEVSI	SPCPEAAEGV	ACTVYRGTNV	SISFDFTPEF	AANELTADVS	WTQPNFDLPF	VGMDTAACKS	TKCPTVSGTR	QTYAYDLPIK	KSYPPKHYDV	KWKLTGENSE	SCCFIVQ???	?
MER566_B	MKYFQTVAIV	ALCLNVAWAE	VVNFKKCPGE	EKCTIHEVSI	TPCPEAAEGV	ACTVYRGTNV	SISFDFTSEF	AANELTADVS	WTQPNFDLPF	VGMDTAACKS	TKCPTVSGTR	QTYAYDLPIK	KSYPPKHYDV	KWKLTGENSE	SCCFIVQ???	?
MER568_A	MKYFQTVAIV	ALCLNVAWAE	VVNFKKCPGE	EKCTIHEVSI	TPCPEAAEGV	ACTVYRGTNV	SISFDFTPEF	AANELTADVS	WTQPNFDLPF	VGMDTAACKS	TKCPMVSGTR	QTYAYDLPIK	KSYPPKHYDV	KWKLTGENSE	SCCFIVQ???	?
MER568_B	MKYFQTVAIV	ALCLNVAWAE	VVNFKKCPGE	EKCTIHEVSI	SPCPEAAEGV	ACTVYRGTNV	SISFDFTPEF	AANELTADVS	WTQPNFDLPF	VGMDTAACKS	TKCPTVSGTR	QTYAYDLPIK	KSYPPKHYDV	KWKLTGENSE	SCCFIVQ???	?
MER572	MKYFQTVAIV	ALCLNVAWAE	VVNFKKCPGE	EKCTIHEVSI	TPCPEAAEGV	ACTVYRGTNV	SISFDFTPEF	AANELTADVS	WTQPNFDLPF	VGMDTAACKS	TKCPTVSGTR	QTYAYDLPIK	KSYPPKHYDV	KWKLTGENSE	SCCFIVQINI	?
OUR69	MKYFQTVAIV	ALCLNVAWAE	VVNFKKCPGE	EKCTIHEVSI	SPCPEAAEGV	ACTVYRGTNV	SISFDFTPEF	AANELTADVS	WTQPNFDLPF	VGMDTAACKS	TKCPTVSGTR	QTYAYDLPIK	KSYPPKHYDV	KWKLTGENSE	SCCFIVQ???	?
OUR70_A	MKYFQTVAIV	ALCLNVAWAE	VVNFKKCPGE	EKCTIHEVSI	SPCPEAAEGV	ACTVYRGTNV	SISFDFTPEF	AANELTADVS	WTQPNFDLPF	VGMDTAACKS	TKCPTVSGTR	QTYAYDLPIK	KSYPPKHYDV	KWK???????	??????????	?
OUR70_B	MKYFQTVAIV	ALCLNVAWAE	VVNFRKCPGE	EKCTIHEVSI	SPCPEAAEGV	ACTVYRGTNV	SISFDFTPEF	AANELTADVS	WTQPNFDLPF	VGMDTAACKS	TKCPTVSGTR	QTYAYDLPIK	KSYPPKHYDV	KWK???????	??????????	?
OUR71_A	MKYFQTVAIV	ALCLNVAWAE	VVNFKKCPGE	EKCTIHEVSI	SPCPEAAEGV	ACTVYRGTNV	SISFDFTPEF	AANELTADVS	WTQPNFDLPF	VGMDTAACKS	TKCPTVSGTR	QTYAYDLPIK	KSYPPKHYDV	KWKLTGEN??	??????????	?
OUR71_B	MKYFQTVAIV	ALCLNVAWAE	VVNFKKCPGE	EKCTIHEVSI	SPCPEAAEGV	ACTVYRGTNV	SISFDFTPEF	AANELTADVS	WTQPNFDLPF	VGMDTAACKS	TKCPTVSGTR	QTYAYDLPIK	KSYPPKHYDV	KW????????	??????????	?
QUA05	???FQTVAIV	ALCLNVAWAE	VVNFKKCPGE	DKCTIHEVSI	SPCPEAAEGV	ACTVYRGTNV	SISFDFTPEF	AANELTADVS	WTQPNFDLPF	VGMDTAACKS	TKCPTVSGTR	QTYAYDLPIK	KSYPPKHYDV	KWKLTGENNE	SCCFIV????	?
QUA07_A	MKLFQTVAIV	ALCLNMAWAE	VVNFKKCPGE	EKCTIHEVSI	SPCPEAAEGV	ACTVYRGTNV	SISFDFTPEF	AANELTADVS	WTQPNFDLPF	VGMDTAACKS	TKCPTVSGTR	QTYAYDLPIK	KSYPPKHYDV	KWKLTGEN??	??????????	?
QUA07_B	MKLFQTVAIV	ALCLNMAWAE	VVNFKKCPGE	EKCTIHEVSI	SPCPEAAEGV	ACTVYRGTNV	SISFDFTPEF	AANELTADVS	WTQPNFDLPF	VGMDTAACKS	TKCPTVSGTR	QTYAYDLPIK	KSYPPKHYDV	KWKLTGENNE	SCCFIVQ???	?
QUA09	???FQTVAIV	ALCLNVAWAE	VVNFKKCPGE	EKCTIHEVSI	S?CPEAAEGV	ACTVYRGTNV	SISFDFTPEF	AANELTADVS	WTQPNFDLPF	VGMDTAACKS	TKCPTVSGTR	QTYAYDLPIK	KSYPPKHYDV	KWKLTGEN??	??????????	?
QUA10_A	MKLYQTVAIV	ALCLNVAWAE	VVNFKKCPGE	EKCTIHEVSI	SPCPEAAEGV	ACTVYRGTNV	SISFDFTPEF	AANELTADVS	WTQPNFDLPF	VGMDTAACKS	TKCPTVSGTR	QTYAYDLPIK	KSYPPKHYDV	KWKLTGENNE	SCCFIVQINI	T
QUA10_B	MKLYQTVAIV	ALCLNVAWAE	VVNFKKCPGE	EKCTIHEVSI	SPCPEAAEGV	ACTVYRGTNV	SISFDFTPEF	AANELTADVS	WTQPNFDLPF	VGMDTAACKS	TKCPTVSGTR	QTYAYDLPIK	KSYPPKHYDV	KWKLTGENSE	SCCFIVQ???	?
QUA11_A	MKFYQTVAIV	ALCLNVAWAE	VVNFKKCPGE	EKCTIHEVSI	SPCPEAAEGV	ACTVYRGTNV	SISFDFTPEF	AANELTADVS	WTQPNFDLPF	VGMDTAACKS	TKCPTVSGTR	QTYAYDLPIK	KSYPPKHYDV	KWKLTGENSE	SCCFI?????	?
QUA11_B	MKFYQTVAIV	ALCLNVAWAE	VVNFKKCPGE	EKCTIHEVSI	SPCPEAAEGV	ACTVYRGTNV	SISFDFTPEF	AANELTADVS	WTQPNFDLPF	VGMDTAACKS	TKCPTVSGTR	QTYAYDLPIK	KSYPPKHYDV	KWKLTGENS?	??????????	?
QUA12_A	MKLFQTVAIV	ALCLNVAWAE	VVNFKKCPGE	EKCTIHEVSI	SPCPEAAEGV	ACTVYRGTNV	SISFDFTPEF	AANELTADVS	WTQPNFDLPF	VGMDTAACKS	TKCPTVSGTR	QTYAYDLPIK	KSYPPKHYDV	KWKLTGEN??	??????????	?
QUA12_B	MKLFQTVAIV	ALCLNVAWAE	VVNFKKCPGE	EKCTIHEVSI	SPCPEAAEGV	ACTVYRGTNV	SISFDFTPEF	AANELTADVS	WTQPNFDLPF	VGMDTAACKS	TKCPTVSGTR	QTYAYDLPIK	KSYPPKHYDV	KWKLTGEN??	??????????	?
QUA16_A	MKLFQTVAIV	ALCLNMAWAE	VVNFKKCPGE	EKCTIHEVSI	SPCPEAAEGV	ACTVYRGANV	GISFDFTPEF	AANELTADVS	WTQPNFDLPF	VGMDTAACKS	TKCPTVSGTR	QTYAYDLPIK	KSYPPKHYDV	KWKLTGENS?	??????????	?
QUA16_B	MKLFQTVAIV	ALCLNMAWAE	VVNFKKCPGE	EKCTIHEVSI	SPCPEAAEGV	ACTVYRGTNV	SISFDFTPEF	AANELTADVS	WTQPNFDLPF	VGMDTAACKS	TKCPTVSGTR	QTYAYDLPIK	KSYPPKHYDV	KWKLTGENS?	??????????	?
QUA17	MKLFQTVAIV	ALCLNVAWAE	VVNFKKCPGE	EKCTIHEVSI	SPCPEAAEGV	ACTVYRGTNV	SISFDFTPEF	AANELTADVS	WTQPNFDLPF	VGMDTAACKS	TKCPTVSGTR	QTYAYDLPIK	KSYPPKHYDV	KWKLTGENN?	??????????	?
QUA20_A	MKLFQTVAIV	ALCLNVAWAE	VVNFKKCPGE	EKCTIHEVSI	SPCPEAAEGV	ACTVYRGTNV	SISFDFTPEF	AANELTADVS	WTQPNFDLPF	VGMDTAACKS	TKCPTVSGTR	QTYAYDLPIK	KSYPPKHYDV	KWKLTGENS?	??????????	?
QUA20_B	MKYFQTVAIV	ALCLNVAWGE	VVNFKKCPGE	EKCTIHEVSI	SPCPEAAEGV	ACTVYRGTNV	SISFDFTPEF	AANELTADVS	WTQPNFDLPF	VGMDTAACKS	TNCPTVSGTR	QTYAYDLPIK	KSYPPKHYDV	KWKLTGENN?	??????????	?
